# Supplementary material
Source: Springer Nature journal article supplement (https://www.springermedizin.de/resource/supplementary/12891_2012_1703_MOESM4_ESM.pdf/9508396)

**(a)**von Mises Stress  
(MPa)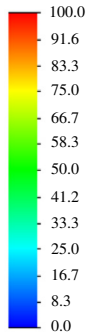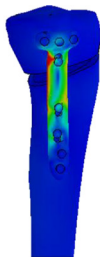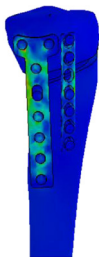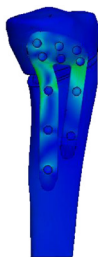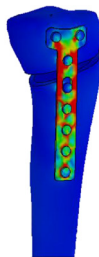**(b)**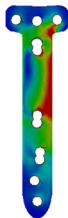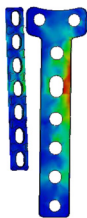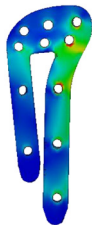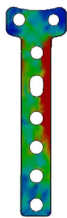

Supplement: MOESM4 [file 9508396]
